# Supplementary material
Source: MDPI journal article supplement (https://www.mdpi.com/2076-3417/14/9/3708)
Supplement: s1 [file s1]

## SOCKET-BIOEMO SURVEY

This survey is conducted as part of the project titled "**BIOMECHANICAL AND EMOTIONAL ANALYSIS FOR ENHANCING THE DESIGN AND MANUFACTURE OF HAND PROSTHESIS SOCKETS**" (ANÁLISIS BIOMECÁNICO Y EMOCIONAL PARA LA MEJORA DEL DISEÑO Y FABRICACIÓN DE ENCAJES DE PRÓTESIS DE MANO) by the Biomechanics and Ergonomics Group at Universitat Jaume I, located in Castelló de la Plana, Spain.

The project, funded by Universitat Jaume I under project number UJI-A2022-19, aims to enhance both the design and manufacturing processes of prosthetic arm sockets. The goal is to tailor them to the specific needs of patients, ultimately reducing rejection rates and enhancing the quality of life for users.

We appreciate your collaboration in advance, as the results of the study could benefit society. Anonymized data may be shared with the scientific community for purposes such as defining protocols for the development of sockets using 3D printing and their improvement.

The researchers commit to using all the data obtained from the study solely for scientific purposes. Your privacy will be protected, and it will be impossible to identify participants in communications or scientific publications resulting from the analysis of the trial's results.

For any questions, you can contact the principal investigators of the project:

Immaculada Llop Harillo (illop@uji.es)  
Alba Roda Sales (rodaa@uji.es)

The study was approved by the Institutional Ethics Committee of Universitat Jaume I (protocol code CEISH/82/2023 and date of approval July 14, 2023).

### Informed consent

- ☐ I have read the information provided in the previous section and I freely consent to participate in this questionnaire.

Signature and date: \_\_\_\_\_

### Contact data

If you wish, please provide contact data (email, phone, etc.) (not mandatory)

\_\_\_\_\_

## 1. PERSONAL DATA

### 1.1. Gender

- ☐ Woman
- ☐ Man
- ☐ I prefer not to say

### 1.2. Age: \_\_\_\_\_

### 1.3. Nationality: \_\_\_\_\_

### 1.4. Level of upper limb amputation or congenital anomaly

- ☐ Partial hand amputation/congenital anomaly
- ☐ Wrist disarticulation
- ☐ Transradial
- ☐ Elbow disarticulation
- ☐ Transhumeral
- ☐ Other: \_\_\_\_\_

### 1.5. In the case of amputation, what has been the cause? (Non-mandatory)

- ☐ A specific pathology/disease
- ☐ Traumatism
- ☐ Surgery
- ☐ Other: \_\_\_\_\_

### 1.6. Limb affected

- ☐ Right
- ☐ Left
- ☐ Both

### 1.7. Dominant hand before amputation

- ☐ Right
- ☐ Left
- ☐ Both
- ☐ None

### 1.8. Dominant hand after amputation

- ☐ Right
- ☐ Left
- ☐ Both

### 1.9. Do you currently use a prosthetic arm?

- ☐ Yes (Please, respond **all the survey sections**)
- ☐ No, but I did in the past (Please, respond sections **2** and **10**, and explain the rejection reasons)
- ☐ No, and I never did (Please, respond section **10** and explain the rejection reasons)

Abandonment reasons: \_\_\_\_\_  
\_\_\_\_\_  
\_\_\_\_\_  
\_\_\_\_\_

## 2. PROSTHETIC ARM USE

Please, respond the following questions regarding the use of your prosthesis, both if you are currently using prosthesis or only used in the past (then, answer based in the prosthesis use you made in the past).

**2.1.** How often do you use the prosthesis while you are awake?

- ☐ 25% of awake time (1-3 hours)
- ☐ Between 25% and 50% of awake time (4-8 hours)
- ☐ More than 50% of awake time (more than 8 hours)
- ☐ All the awake time (12-16 hours)

**2.2.** Do you use the prosthesis to perform activities of daily living?

- ☐ Only for going to the orthopedist
- ☐ Only at home (not for going out)
- ☐ Occasionally outside the home
- ☐ Only outside the home (not at home)
- ☐ All the time (at home and outside)

**2.3.** How often do you use the prosthesis in the following environments? (Mark with an “x”)

|                          | Never | Rarely | Sometimes | Often | Always |
|--------------------------|-------|--------|-----------|-------|--------|
| With family              |       |        |           |       |        |
| Alone                    |       |        |           |       |        |
| At work                  |       |        |           |       |        |
| During sports activities |       |        |           |       |        |
| At beach/pool            |       |        |           |       |        |
| Social relationships     |       |        |           |       |        |
| Nightlife                |       |        |           |       |        |

### 3. PROSTHESIS CHARACTERISTICS

We would appreciate information about your current prosthesis, in order to identify potential design aspects that could benefit from improvement.

#### 3.1. Type of prosthesis control

- ☐ Passive
- ☐ Mechanical control (controlled with other part of the body)
- ☐ Electric control (controlled with switches and electrical actuators)
- ☐ Myoelectric control (controlled with limb muscular activation)
- ☐ Other: \_\_\_\_\_

#### 3.2. Type of prosthesis

- ☐ Commercial
- ☐ 3D printed
- ☐ Other: \_\_\_\_\_

3.3. Please indicate the model/manufacturer of your prosthetic arm. If you don't know, please describe its type (hook, anthropomorphic, etc.): \_\_\_\_\_

3.4. How long did it take you to learn to use your prosthesis? \_\_\_\_\_

## 4. PROSTHETIC SOCKET CHARACTERISTICS

We would appreciate information about your current prosthetic socket, in order to identify potential design aspects that could benefit from improvement.

### 4.1. Socket fixing system

- ☐ Elastic straps
- ☐ Velcro straps
- ☐ Rigid structure
- ☐ Mechanical fixing system
- ☐ Other: \_\_\_\_\_

### 4.2. In which part of the upper limb is the socket attached? (select as many as necessary)

- ☐ Hand
- ☐ Forearm
- ☐ Elbow
- ☐ Arm (biceps - triceps)
- ☐ Shoulder
- ☐ Scapula
- ☐ Torso
- ☐ Other: \_\_\_\_\_

### 4.3. Socket material(s) (select as many as necessary)

- ☐ Rigid polymers (plastic, resin)
- ☐ Flexible polymers (rubber, foam)
- ☐ Fabric
- ☐ Metal
- ☐ Other: \_\_\_\_\_

### 4.4. Socket material(s) in direct contact with the limb (select as many as necessary)

- ☐ Rigid polymers (plastic, resin)
- ☐ Flexible polymers (rubber, foam)
- ☐ Fabric
- ☐ Metal
- ☐ Other: \_\_\_\_\_

### 4.5. Is the socket sensorized?

- ☐ Yes, with EMG electrodes
- ☐ No
- ☐ Other: \_\_\_\_\_

### 4.6. If your prosthesis is electric, is the battery located within the socket itself?

- ☐ Yes
- ☐ No
- ☐ Other: \_\_\_\_\_

**4.7.** Which was the socket manufacturing process?

- ☐ Molding
- ☐ 3D printing
- ☐ Other: \_\_\_\_\_

**4.8.** How were the anthropometric measurements obtained for the fabrication of your socket?  
(select as many as necessary)

- ☐ X-ray imaging
- ☐ MRI imaging / CAT scan
- ☐ 3D scanning technology
- ☐ Molding
- ☐ Manual anthropometric measurements by a prosthetist
- ☐ Other: \_\_\_\_\_

## 5. SOCKET MANUFACTURING

Please indicate on a scale of 1 to 5 your level of agreement with the following statements:

**M1.** The socket was ready in a short period of time

|                   | 1                        | 2                        | 3                        | 4                        | 5                        |                |
|-------------------|--------------------------|--------------------------|--------------------------|--------------------------|--------------------------|----------------|
| Strongly disagree | <input type="checkbox"/> | Strongly agree |

**M2.** The residual limb morphology measurement was comfortable

|                   | 1                        | 2                        | 3                        | 4                        | 5                        |                |
|-------------------|--------------------------|--------------------------|--------------------------|--------------------------|--------------------------|----------------|
| Strongly disagree | <input type="checkbox"/> | Strongly agree |

**M3.** The residual limb morphology measurement was not invasive

|                   | 1                        | 2                        | 3                        | 4                        | 5                        |                |
|-------------------|--------------------------|--------------------------|--------------------------|--------------------------|--------------------------|----------------|
| Strongly disagree | <input type="checkbox"/> | Strongly agree |

**M4.** Almost no fit adjustments were required after the final shape

|                   | 1                        | 2                        | 3                        | 4                        | 5                        |                |
|-------------------|--------------------------|--------------------------|--------------------------|--------------------------|--------------------------|----------------|
| Strongly disagree | <input type="checkbox"/> | Strongly agree |

**M5.** In general, I am satisfied with the socket manufacturing process

|                   | 1                        | 2                        | 3                        | 4                        | 5                        |                |
|-------------------|--------------------------|--------------------------|--------------------------|--------------------------|--------------------------|----------------|
| Strongly disagree | <input type="checkbox"/> | Strongly agree |

If you have any further comments about the manufacturing process of your socket we would appreciate it:

---

---

---

## 6. SOCKET COMFORT

Please indicate on a scale of 1 to 5 your level of agreement with the following statements:

**C1.** The socket is comfortable and does not cause any skin wound

|                   | 1                        | 2                        | 3                        | 4                        | 5                        |                |
|-------------------|--------------------------|--------------------------|--------------------------|--------------------------|--------------------------|----------------|
| Strongly disagree | <input type="checkbox"/> | Strongly agree |

**C2.** The socket has an appropriate weight given its characteristics

|                   | 1                        | 2                        | 3                        | 4                        | 5                        |                |
|-------------------|--------------------------|--------------------------|--------------------------|--------------------------|--------------------------|----------------|
| Strongly disagree | <input type="checkbox"/> | Strongly agree |

**C3.** The socket is breathable and does not cause excess sweating

|                   | 1                        | 2                        | 3                        | 4                        | 5                        |                |
|-------------------|--------------------------|--------------------------|--------------------------|--------------------------|--------------------------|----------------|
| Strongly disagree | <input type="checkbox"/> | Strongly agree |

**C4.** The socket has a good fixing system and there are no unexpected displacements

|                   | 1                        | 2                        | 3                        | 4                        | 5                        |                |
|-------------------|--------------------------|--------------------------|--------------------------|--------------------------|--------------------------|----------------|
| Strongly disagree | <input type="checkbox"/> | Strongly agree |

**C5.** The socket has a good fixing system and the motion control is not lost (only for prosthetics with mechanical, electrical or myoelectrical control)

|                   | 1                        | 2                        | 3                        | 4                        | 5                        |                |
|-------------------|--------------------------|--------------------------|--------------------------|--------------------------|--------------------------|----------------|
| Strongly disagree | <input type="checkbox"/> | Strongly agree |

**C6.** The socket does not cause pain

|                   | 1                        | 2                        | 3                        | 4                        | 5                        |                |
|-------------------|--------------------------|--------------------------|--------------------------|--------------------------|--------------------------|----------------|
| Strongly disagree | <input type="checkbox"/> | Strongly agree |



**C7.** The process of fixing and removing the socket is comfortable

|                   | 1                        | 2                        | 3                        | 4                        | 5                        |                |
|-------------------|--------------------------|--------------------------|--------------------------|--------------------------|--------------------------|----------------|
| Strongly disagree | <input type="checkbox"/> | Strongly agree |

**C8.** In general, I am satisfied with socket comfort

|                   | 1                        | 2                        | 3                        | 4                        | 5                        |                |
|-------------------|--------------------------|--------------------------|--------------------------|--------------------------|--------------------------|----------------|
| Strongly disagree | <input type="checkbox"/> | Strongly agree |

If you have any further comments about the comfort of your socket we would appreciate it:

---

---

---

## 7. SOCKET FUNCTIONALITY

Please indicate on a scale of 1 to 5 your level of agreement with the following statements:

**F1.** The socket allows me to perform all the activities of daily living I need

|                   |                          |                          |                          |                          |                          |                |
|-------------------|--------------------------|--------------------------|--------------------------|--------------------------|--------------------------|----------------|
|                   | 1                        | 2                        | 3                        | 4                        | 5                        |                |
| Strongly disagree | <input type="checkbox"/> | Strongly agree |

Please indicate your level of ability to perform activities in the following fields by marking with an "x":

|                     | With considerable difficulty | With difficulty | Can be accomplished | Easily | Very easily |
|---------------------|------------------------------|-----------------|---------------------|--------|-------------|
| Personal hygiene    |                              |                 |                     |        |             |
| Personal care       |                              |                 |                     |        |             |
| Dressing/Undressing |                              |                 |                     |        |             |
| Eating/Drinking     |                              |                 |                     |        |             |
| Cooking             |                              |                 |                     |        |             |
| Cleaning            |                              |                 |                     |        |             |
| Home DIY activities |                              |                 |                     |        |             |
| Entertainment       |                              |                 |                     |        |             |
| Sports              |                              |                 |                     |        |             |
| Using computer      |                              |                 |                     |        |             |

Are there any activities that you would like to do in your daily life that your prosthesis does not allow you to? Please indicate them: \_\_\_\_\_

**F2.** The socket allows me to perform all the activities of daily living with all the products I need

|                   |                          |                          |                          |                          |                          |                |
|-------------------|--------------------------|--------------------------|--------------------------|--------------------------|--------------------------|----------------|
|                   | 1                        | 2                        | 3                        | 4                        | 5                        |                |
| Strongly disagree | <input type="checkbox"/> | Strongly agree |

Please indicate your level of ability to perform activities with the following products by marking with an "x":

|                           | With considerable difficulty | With difficulty | Can be accomplished | Easily | Very easily |
|---------------------------|------------------------------|-----------------|---------------------|--------|-------------|
| Bottles and glasses       |                              |                 |                     |        |             |
| Cereal boxes and books    |                              |                 |                     |        |             |
| Medium size balls         |                              |                 |                     |        |             |
| Pens and pencils          |                              |                 |                     |        |             |
| Coins and credit cards    |                              |                 |                     |        |             |
| Keys                      |                              |                 |                     |        |             |
| Fork and knife            |                              |                 |                     |        |             |
| Bags and luggage          |                              |                 |                     |        |             |
| Keyboard and mobile phone |                              |                 |                     |        |             |

Are there products you would like to use that your prosthesis does not allow you to? Please indicate them: \_\_\_\_\_

**F3.** The socket has enough rigidity and does not deform while performing high-stress tasks

|                   | 1                        | 2                        | 3                        | 4                        | 5                        |                |
|-------------------|--------------------------|--------------------------|--------------------------|--------------------------|--------------------------|----------------|
| Strongly disagree | <input type="checkbox"/> | Strongly agree |

Approximately, what is the maximum weight (in kg) that you can lift with your prosthesis?

\_\_\_\_\_

**F4.** In general, I am satisfied with socket functionality

|                   | 1                        | 2                        | 3                        | 4                        | 5                        |                |
|-------------------|--------------------------|--------------------------|--------------------------|--------------------------|--------------------------|----------------|
| Strongly disagree | <input type="checkbox"/> | Strongly agree |

If you have any further comments about the functionality of your socket we would appreciate it:

\_\_\_\_\_  
\_\_\_\_\_  
\_\_\_\_\_

## 8. SOCKET APPEARANCE

Please indicate on a scale of 1 to 5 your level of agreement with the following statements:

**A1.** I like the socket's shape

|                   | 1                        | 2                        | 3                        | 4                        | 5                        |                |
|-------------------|--------------------------|--------------------------|--------------------------|--------------------------|--------------------------|----------------|
| Strongly disagree | <input type="checkbox"/> | Strongly agree |

**A2.** The socket size is not excessive

|                   | 1                        | 2                        | 3                        | 4                        | 5                        |                |
|-------------------|--------------------------|--------------------------|--------------------------|--------------------------|--------------------------|----------------|
| Strongly disagree | <input type="checkbox"/> | Strongly agree |

**A3.** The socket color is appropriate

|                   | 1                        | 2                        | 3                        | 4                        | 5                        |                |
|-------------------|--------------------------|--------------------------|--------------------------|--------------------------|--------------------------|----------------|
| Strongly disagree | <input type="checkbox"/> | Strongly agree |

**A4.** I like the socket surface finishing

|                   | 1                        | 2                        | 3                        | 4                        | 5                        |                |
|-------------------|--------------------------|--------------------------|--------------------------|--------------------------|--------------------------|----------------|
| Strongly disagree | <input type="checkbox"/> | Strongly agree |

**A5.** The socket design is attractive and does not look like orthopedic

|                   | 1                        | 2                        | 3                        | 4                        | 5                        |                |
|-------------------|--------------------------|--------------------------|--------------------------|--------------------------|--------------------------|----------------|
| Strongly disagree | <input type="checkbox"/> | Strongly agree |

**A6.** I had the chance of choosing between different socket designs

|                   | 1                        | 2                        | 3                        | 4                        | 5                        |                |
|-------------------|--------------------------|--------------------------|--------------------------|--------------------------|--------------------------|----------------|
| Strongly disagree | <input type="checkbox"/> | Strongly agree |

**A7.** In general, I am satisfied with the socket's appearance

|                   | 1                        | 2                        | 3                        | 4                        | 5                        |                |
|-------------------|--------------------------|--------------------------|--------------------------|--------------------------|--------------------------|----------------|
| Strongly disagree | <input type="checkbox"/> | Strongly agree |

**A8.** Which of these words would best define the style of socket you would prefer? Mark with an “x”.

|              | 1 | 2 | 3 | 4 | 5 |          |
|--------------|---|---|---|---|---|----------|
| Stylish      |   |   |   |   |   | Sportive |
| Modern       |   |   |   |   |   | Classic  |
| Colorful     |   |   |   |   |   | Neutral  |
| Eye-catching |   |   |   |   |   | Discreet |
| Patterned    |   |   |   |   |   | Plain    |

If you have any further comments about the appearance of your socket we would appreciate it:

---

---

---

## 9. DURABILITY AND COST

**D1.** How often do you change your socket? \_\_\_\_\_

**D2.** How often do you send a component of your prosthesis for repair or replacement? \_\_\_\_\_

**D3.** If your prosthesis is electric, how often do you recharge its battery? \_\_\_\_\_

**D4.** Can you afford the costs of purchasing and/or maintaining your socket?

|                              | 1                        | 2                        | 3                        | 4                        | 5                        |             |
|------------------------------|--------------------------|--------------------------|--------------------------|--------------------------|--------------------------|-------------|
| With considerable difficulty | <input type="checkbox"/> | Very easily |

**D5.** Can you afford the costs of purchasing and/or maintaining your prosthesis?

|                              | 1                        | 2                        | 3                        | 4                        | 5                        |             |
|------------------------------|--------------------------|--------------------------|--------------------------|--------------------------|--------------------------|-------------|
| With considerable difficulty | <input type="checkbox"/> | Very easily |

## 10. UPPER LIMB SOCKETS CHARACTERISTICS

Please indicate on a scale of 1 to 5 how important you consider the following aspects in a prosthetic socket (mark with an “x”):

|                                                                   | Not<br>important<br>at all | Low<br>importance | Indifferent | Somewhat<br>important | Very<br>important |
|-------------------------------------------------------------------|----------------------------|-------------------|-------------|-----------------------|-------------------|
| P1. Fast manufacturing                                            |                            |                   |             |                       |                   |
| P2. Easy anthropometric measurement process                       |                            |                   |             |                       |                   |
| P3. No need for shape adjustments                                 |                            |                   |             |                       |                   |
| P4. Comfort (not causing skin wounds)                             |                            |                   |             |                       |                   |
| P5. Breathability                                                 |                            |                   |             |                       |                   |
| P6. Easy fixing system                                            |                            |                   |             |                       |                   |
| P7. Stable fixing system                                          |                            |                   |             |                       |                   |
| P8. Lightweight                                                   |                            |                   |             |                       |                   |
| P9. Allows me to perform the activities of daily living I need    |                            |                   |             |                       |                   |
| P10. Allows me to use the products I need                         |                            |                   |             |                       |                   |
| P11. Allows me to carry the weight I need                         |                            |                   |             |                       |                   |
| P12. Has enough rigidity and does not deform in high-stress tasks |                            |                   |             |                       |                   |
| P13. Attractive shape                                             |                            |                   |             |                       |                   |
| P14. Small size                                                   |                            |                   |             |                       |                   |
| P15. Appropriate color                                            |                            |                   |             |                       |                   |
| P16. Appropriate surface finishing                                |                            |                   |             |                       |                   |
| P17. Attractive design                                            |                            |                   |             |                       |                   |
| P18. Low maintenance required                                     |                            |                   |             |                       |                   |
| P19. Low cost                                                     |                            |                   |             |                       |                   |
